# Supplementary material for: Knowledge, Perceptions, and Practices of Healthcare Professionals on Pharmacovigilance and Adverse Drug Reaction Reporting at Cheikh Zaid International University Hospital in Rabat
Source: Research Square preprint supplement (doi:10.21203/rs.3.rs-6593885/v1), 2025-06-03
Supplement: Supplementary file 1 [file d3df599093f586ff881d6232.pdf]

# Supplementary File: English Version of the Questionnaire

## ANONYMOUS SURVEY

*Knowledge, Perceptions, and Practices of Healthcare Professionals on Pharmacovigilance and Adverse Drug Reaction Reporting at Cheikh Zaid International University Hospital in Rabat*

---

## INTRODUCTION

Patient safety is a major priority for healthcare professionals. This makes the reporting of adverse events related to the use of medicines and health products crucial. By reporting these adverse effects, healthcare professionals help improve patient safety and the quality of healthcare within the hospital.

This local survey will be conducted at the hospital as part of a pharmacy thesis project at the International University Abulcasis of Health Sciences.

The survey is anonymous and consists of 4 sections, targeting healthcare professionals at the hospital, including doctors, nurses, pharmacists, interns, and residents. It aims to study the pharmacovigilance system within the hospital.

The survey will take place from September 2023 to March 2024, over 7 months.

For any additional information, please contact us at: [pharmacovigilanceHCZ@gmail.com](mailto:pharmacovigilanceHCZ@gmail.com)

---

## CHAPTER 1: PERSONAL INFORMATION

1. Gender
  - ☐ Male
  - ☐ Female
  
2. What is your age group?
  - ☐ 18 – 24 years
  - ☐ 25 – 35 years
  - ☐ 36 – 50 years
  - ☐ 51 – 64 years

☐ Over 65 years

3. At the hospital, what category do you belong to?

- ☐ Specialist doctor
- ☐ Surgeon
- ☐ General practitioner
- ☐ Pharmacist
- ☐ Specialist pharmacist
- ☐ General nurse
- ☐ Anesthesia/intensive care nurse
- ☐ Midwife
- ☐ Intern
- ☐ Resident

Other: (please specify) \_\_\_\_\_

3.1. Which department do you work in?

---

---

## CHAPTER 2: KNOWLEDGE ABOUT PHARMACOVIGILANCE

4. Do you know what pharmacovigilance is?

- ☐ Yes
- ☐ No

If yes, please specify: \_\_\_\_\_

5. In your opinion, what is the importance of pharmacovigilance in Cheikh Zaid Hospital?

---

6. Are you aware that there is a Poison Control and Pharmacovigilance Center in Morocco (CAPM)?

- ☐ Yes
- ☐ No

6.1 If yes, how did you learn about this center?

- ☐ Continuing education
- ☐ University curriculum
- ☐ Media
- ☐ Social networks

☐ Professional practice

Other (please specify): \_\_\_\_\_

7. In your opinion, what is a pharmacovigilance structure implemented within the hospital?

☐ Yes

☐ No

8. In your practice, are you aware that adverse drug reactions or effects can occur?

☐ Yes

☐ No

9. Do you know the difference between an adverse effect and an adverse event?

☐ Yes

☐ No

9.1 If yes, please describe the difference:

---

10. In case of an adverse event where you doubt the causal link with the medicine, do you report this event on the pharmacovigilance form?

☐ Yes

☐ No

10.1 If no, why don't you report?

☐ It takes too much time

☐ It is useless

☐ It is not my responsibility

☐ Fear of liability

☐ I didn't know before

Other (please specify): \_\_\_\_\_

10.2 If yes, in which cases do you think it is necessary to report?

☐ Elderly patient

☐ Hospitalization

☐ Patient with chronic disease

☐ Pregnant woman

☐ Pediatric population

☐ Serious adverse event

☐ Adverse event leading to patient death

☐ Complications during treatment

☐ Appearance of a new adverse effect

Other (please specify): \_\_\_\_\_

11. In your opinion, when should an adverse event be reported?

- ☐ Drug misuse
- ☐ Off-label prescription
- ☐ Drug quality issues
- ☐ Treatment efficacy (in case of therapeutic failure)
- ☐ Prescription/dosage errors
- ☐ Overdose

Other (please specify): \_\_\_\_\_

12. Is there a pharmacovigilance reporting form available at the hospital?

- ☐ Yes
- ☐ No
- ☐ I don't know

13. If you have reported, how many cases have you reported on average?

- ☐ None
- ☐ Between 1 and 10 cases
- ☐ Between 11 and 20 cases
- ☐ More than 21 cases

14. How do you prefer to report?

- ☐ Electronically via a platform
- ☐ On paper
- ☐ Prefer not to report at all

---

## CHAPTER 3: LIMITATIONS OF PHARMACOVIGILANCE

15. What do you think are the factors limiting the reporting of adverse drug reactions?

- ☐ Lack of time to report
- ☐ The reporting procedure is too complicated
- ☐ Doubt about the link between the drug and the adverse event
- ☐ Reporting is not mandatory
- ☐ Not knowing to whom to report
- ☐ Keeping information for publication
- ☐ The reporting form is not available
- ☐ Other professionals do not report
- ☐ It is exclusively the pharmacist's job
- ☐ It is exclusively the doctor's job
- ☐ Lack of knowledge about the reporting process
- ☐ Fear of legal liability regarding adverse events
- ☐ Fear for professional reputation

Other (please specify): \_\_\_\_\_

---

## CHAPTER 4: TRAINING AND SUGGESTIONS

16. Do you think training is necessary to learn about pharmacovigilance and when to report?

☐ Yes

☐ No

17. How do you think the safety of medicine/health product use could be improved for patients? (Open question)

---

18. What topics would you prefer to receive training on regarding pharmacovigilance? (Open question)

---

19. Are you in favor of establishing a structured and organized pharmacovigilance system in the hospital?

☐ Yes

☐ No

20. How do you think you could contribute to establishing the pharmacovigilance system within the hospital? (Open question)

---

**Thank you for your participation!**
